# Supplementary material for: Pathogenicity and Antibiotic Resistance Diversity in Clostridium perfringens Isolates from Poultry Affected by Necrotic Enteritis in Canada
Source: MDPI journal article supplement (doi:10.3390/pathogens12070905), 2023-07-03

**Supplementary Figure S1.** Genetic alignments of the *erm*(T) methylases of *C. perfringens* MLG1108 and MLG7009 with *erm*(T) methylases from other species

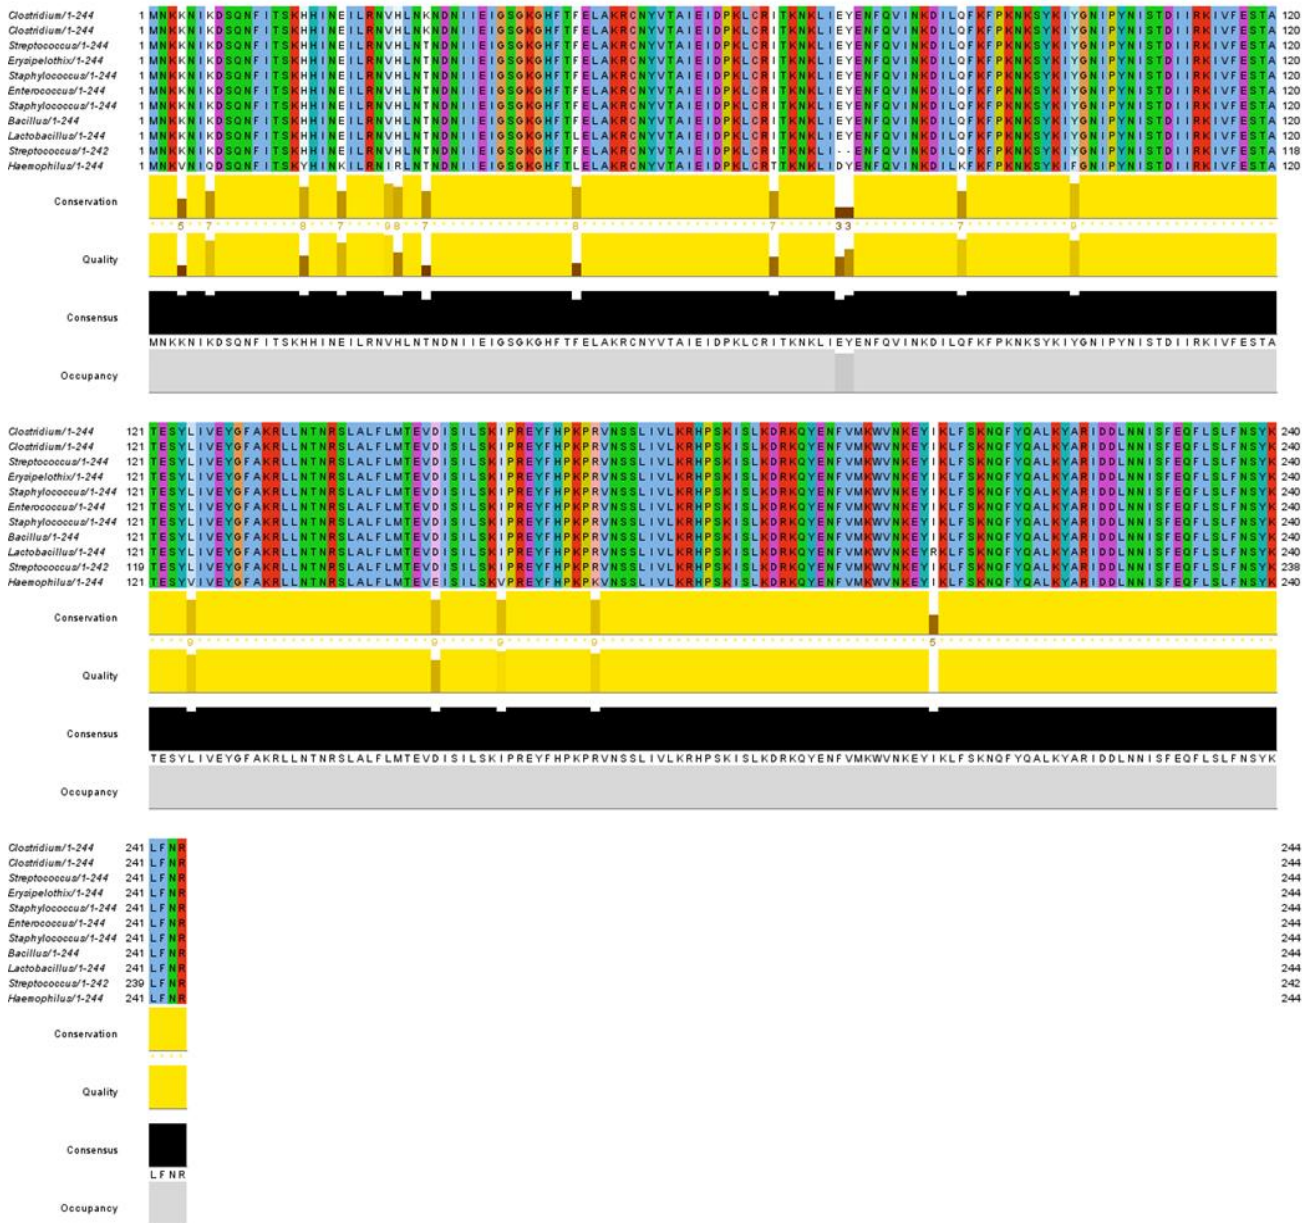

**Supplementary Figure S2.** Alignment of the bacteriocin BCN5 from our isolates (*C. perfringens* MLG3406, MLG4206, MLG5719, MLG2919 and MLG7307) and two bacteriocin BCN5 from GenBank database (P08696 and BAD90628)

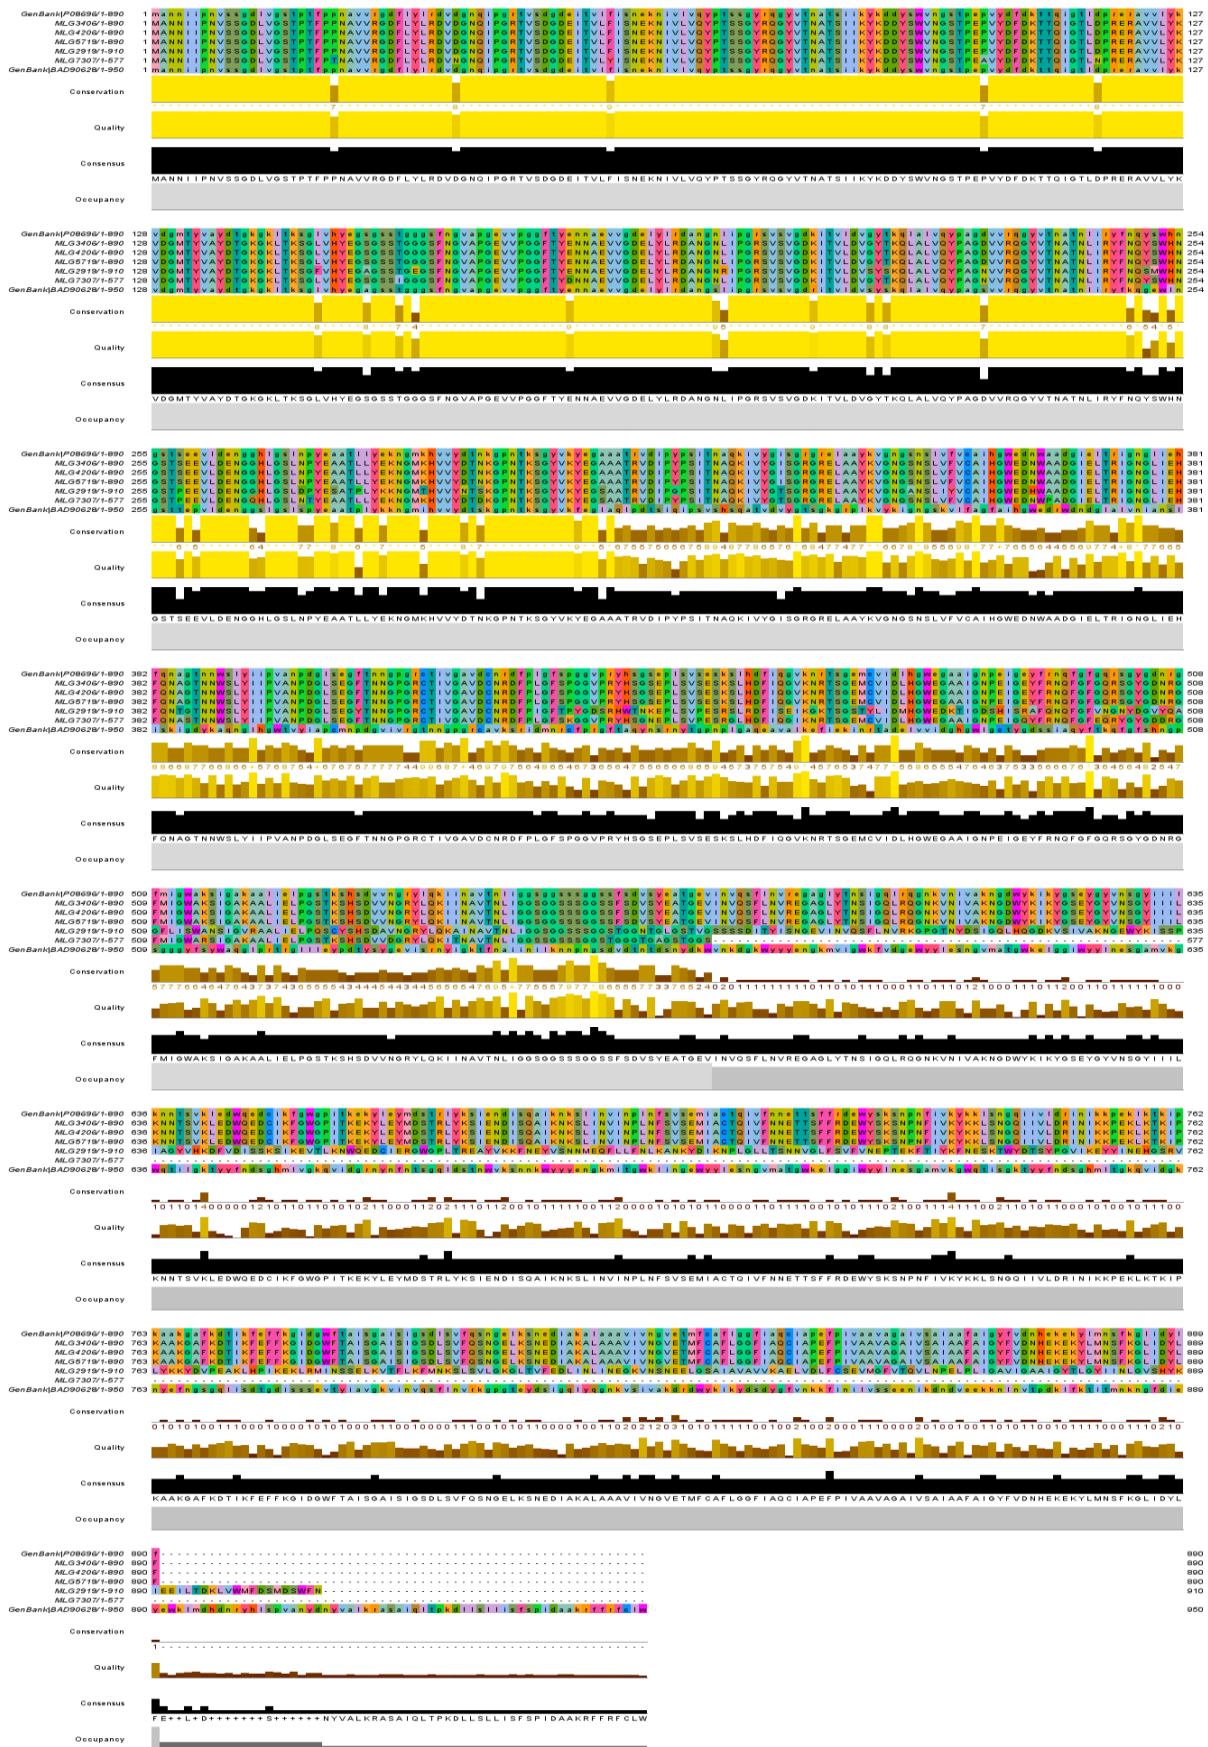

Supplement: s1 [file s1]
